# Supplementary material
Source: PubMed Central journal article supplement (PMC3606656)
Supplement: NIHMS416572-supplement-13524_2012_159_MOESM1_ESM.pdf [file NIHMS416572-supplement-13524_2012_159_MOESM1_ESM.pdf]

## Online Resource 1

### The Contribution of Smoking to Black-White Differences in U.S. Mortality

Jessica Y. Ho and Irma T. Elo

**Table S1.** Percentage of deaths attributable to smoking at ages 50+ by sex, blacks and whites, United States, select years between 1980 and 2005

| Year | Male   |        | Female |        |
|------|--------|--------|--------|--------|
|      | Whites | Blacks | Whites | Blacks |
| 1980 | 21.8   | 28.8   | 5.9    | 6.3    |
| 1985 | 22.5   | 30.7   | 8.1    | 8.3    |
| 1990 | 23.2   | 31.7   | 11.0   | 10.8   |
| 1995 | 21.8   | 29.6   | 12.9   | 11.8   |
| 2000 | 19.9   | 26.0   | 13.9   | 12.3   |
| 2005 | 18.5   | 23.6   | 14.3   | 13.1   |

**Table S2.** Life expectancy at age 50 and the black-white gap in life expectancy at age 50 with and without smoking-attributable deaths, United States, select years between 1980 and 2005

| Males   |              |        |           |                 |        |           |                               |
|---------|--------------|--------|-----------|-----------------|--------|-----------|-------------------------------|
| Year    | With Smoking |        |           | Without Smoking |        |           | % Gap Attributable to Smoking |
|         | Whites       | Blacks | Gap (W-B) | Whites          | Blacks | Gap (W-B) |                               |
| 1980    | 25.21        | 21.69  | 3.52      | 27.88           | 25.67  | 2.22      | 36.99                         |
| 1985    | 25.80        | 22.15  | 3.65      | 28.57           | 26.58  | 1.99      | 45.33                         |
| 1990    | 26.76        | 22.56  | 4.20      | 29.62           | 27.06  | 2.56      | 39.03                         |
| 1995    | 27.41        | 23.11  | 4.30      | 30.07           | 27.17  | 2.90      | 32.41                         |
| 2000    | 28.23        | 24.30  | 3.93      | 30.62           | 27.75  | 2.88      | 26.70                         |
| 2005    | 28.98        | 25.11  | 3.87      | 31.18           | 28.19  | 2.99      | 22.70                         |
| Females |              |        |           |                 |        |           |                               |
| Year    | With Smoking |        |           | Without Smoking |        |           | % Gap Attributable to Smoking |
|         | Whites       | Blacks | Gap (W-B) | Whites          | Blacks | Gap (W-B) |                               |
| 1980    | 30.92        | 27.37  | 3.55      | 31.66           | 28.17  | 3.49      | 1.71                          |
| 1985    | 31.19        | 27.93  | 3.26      | 32.23           | 29.04  | 3.19      | 2.03                          |
| 1990    | 31.69        | 28.25  | 3.44      | 33.06           | 29.66  | 3.40      | 0.96                          |
| 1995    | 31.80        | 28.50  | 3.30      | 33.40           | 30.02  | 3.38      | -2.42                         |
| 2000    | 32.06        | 29.17  | 2.89      | 33.77           | 30.76  | 3.01      | -4.27                         |
| 2005    | 32.64        | 29.99  | 2.65      | 34.36           | 31.65  | 2.71      | -2.47                         |
